# Supplementary material
Source: PubMed Central journal article supplement (PMC5069443)
Supplement: ijbsv12p1213s1.pdf [file ijbsv12p1213s1.pdf]

Table S1 The body weights and muscle masses of rats in sham and burn group

| Group | 3d after injury |                 | 7d after injury |                 |
|-------|-----------------|-----------------|-----------------|-----------------|
|       | Body weight (g) | Muscle mass (g) | Body weight (g) | Muscle mass (g) |
| Sham  | 203             | 0.4141          | 202             | 0.3836          |
|       | 204             | 0.3975          | 238             | 0.4752          |
|       | 205             | 0.447           | 237             | 0.4178          |
|       | 186             | 0.3686          | 257             | 0.4148          |
|       | 208             | 0.4178          | 242             | 0.4567          |
| Burn  | 194             | 0.2759          | 185             | 0.2184          |
|       | 202             | 0.3363          | 198             | 0.2623          |
|       | 181             | 0.2859          | 197             | 0.2407          |
|       | 191             | 0.2798          | 148             | 0.2434          |
|       | 202             | 0.2907          | 161             | 0.2047          |

Table S2 The body weights and muscle masses of rats in vehicle and miR-628 group

| Group   | 3d after injury |                 | 7d after injury |                 |
|---------|-----------------|-----------------|-----------------|-----------------|
|         | Body weight (g) | Muscle mass (g) | Body weight (g) | Muscle mass (g) |
| Vehicle | 242             | 0.4365          | 302             | 0.5168          |
|         | 256             | 0.4169          | 284             | 0.4692          |
|         | 251             | 0.43            | 291             | 0.5186          |
|         | 245             | 0.4654          | 296             | 0.5043          |
|         | 251             | 0.4863          | 305             | 0.5113          |
| miR-628 | 258             | 0.4215          | 277             | 0.4328          |
|         | 250             | 0.3999          | 268             | 0.4249          |
|         | 245             | 0.4066          | 277             | 0.462           |
|         | 241             | 0.3974          | 273             | 0.4218          |
|         | 234             | 0.3657          | 279             | 0.4492          |

Table S3 The body weights and muscle masses of rats in PBS and Z-VAD-FMK group after burn injury

| Group     | 3d after injury |                 | 7d after injury |                 |
|-----------|-----------------|-----------------|-----------------|-----------------|
|           | Body weight (g) | Muscle mass (g) | Body weight (g) | Muscle mass (g) |
| PBS       | 222             | 0.3864          | 268             | 0.4483          |
|           | 238             | 0.4367          | 281             | 0.4386          |
|           | 249             | 0.4323          | 278             | 0.3762          |
|           | 243             | 0.4139          | 224             | 0.3537          |
|           | 261             | 0.4472          | 278             | 0.4282          |
| Z-VAD-FMK | 235             | 0.4813          | 276             | 0.521           |
|           | 231             | 0.4407          | 288             | 0.544           |
|           | 224             | 0.3982          | 259             | 0.4747          |
|           | 232             | 0.4261          | 284             | 0.5133          |
|           | 225             | 0.4166          | 287             | 0.5052          |
